# Supplementary material for: Identification and characterization of microRNAs from Chinese pollination constant non-astringent persimmon using high-throughput sequencing
Source: BMC Plant Biol. 2015 Jan 21;15:11. doi: 10.1186/s12870-014-0400-6 (PMC4308916; doi:10.1186/s12870-014-0400-6)
Supplement: Additional file 2: Figure S1. — Identification of novel miRNAs. [file 12870_2014_400_MOESM2_ESM.pdf]

## Sheet: RF classifier feature sets
#Column Top 500 DE genes: Top 500 differentially expressed genes ordered by absolute M-values
#Column Top 500 DVC genes: Top 500 differentially variable genes ordered by absolute CV differences
#Column Top 500 DEV genes: Top 500 differentially variable genes ordered by absolute EV differences
Top 500 DE genes	Top 500 DCV genes	Top 500 DEV Genes
ENSG00000175445	ENSG00000169877	ENSG00000170180
ENSG00000008405	ENSG00000223609	ENSG00000126787
ENSG00000174469	ENSG00000127074	ENSG00000126890
ENSG00000168594	ENSG00000144642	ENSG00000004939
ENSG00000184226	ENSG00000133742	ENSG00000188672
ENSG00000127951	ENSG00000170180	ENSG00000112077
ENSG00000158528	ENSG00000166947	ENSG00000198963
ENSG00000133104	ENSG00000105610	ENSG00000187010
ENSG00000082438	ENSG00000163554	ENSG00000250361
ENSG00000197256	ENSG00000158578	ENSG00000169877
ENSG00000186522	ENSG00000112077	ENSG00000133742
ENSG00000060982	ENSG00000184226	ENSG00000166947
ENSG00000069702	ENSG00000126890	ENSG00000148773
ENSG00000110852	ENSG00000143416	ENSG00000149557
ENSG00000185697	ENSG00000176890	ENSG00000163827
ENSG00000180530	ENSG00000126787	ENSG00000170558
ENSG00000163736	ENSG00000163631	ENSG00000163554
ENSG00000115085	ENSG00000197888	ENSG00000145555
ENSG00000198142	ENSG00000105974	ENSG00000151491
ENSG00000105967	ENSG00000198142	ENSG00000014914
ENSG00000110987	ENSG00000198046	ENSG00000159788
ENSG00000132704	ENSG00000105967	ENSG00000060138
ENSG00000114013	ENSG00000198963	ENSG00000143416
ENSG00000155090	ENSG00000179750	ENSG00000107447
ENSG00000163564	ENSG00000186827	ENSG00000170312
ENSG00000081059	ENSG00000163600	ENSG00000171848
ENSG00000198947	ENSG00000004939	ENSG00000133069
ENSG00000065534	ENSG00000171848	ENSG00000105610
ENSG00000122644	ENSG00000257017	ENSG00000204613
ENSG00000107957	ENSG00000109906	ENSG00000162627
ENSG00000117090	ENSG00000204634	ENSG00000123201
ENSG00000185920	ENSG00000171246	ENSG00000117724
ENSG00000131016	ENSG00000170558	ENSG00000172380
ENSG00000189058	ENSG00000244405	ENSG00000142949
ENSG00000156265	ENSG00000133878	ENSG00000111732
ENSG00000167751	ENSG00000224916	ENSG00000184838
ENSG00000105928	ENSG00000234906	ENSG00000119888
ENSG00000169031	ENSG00000197256	ENSG00000165092
ENSG00000051128	ENSG00000166803	ENSG00000118271
ENSG00000164136	ENSG00000172594	ENSG00000158578
ENSG00000163737	ENSG00000176105	ENSG00000129173
ENSG00000163697	ENSG00000130529	ENSG00000134755
ENSG00000144642	ENSG00000169031	ENSG00000134531
ENSG00000182195	ENSG00000117724	ENSG00000167768
ENSG00000240505	ENSG00000197632	ENSG00000156427
ENSG00000048052	ENSG00000156427	ENSG00000066279
ENSG00000156011	ENSG00000157456	ENSG00000176890
ENSG00000101162	ENSG00000168594	ENSG00000144642
ENSG00000168497	ENSG00000160789	ENSG00000143476
ENSG00000118432	ENSG00000135218	ENSG00000141556
ENSG00000153064	ENSG00000164458	ENSG00000224916
ENSG00000033867	ENSG00000158874	ENSG00000234906
ENSG00000179299	ENSG00000101335	ENSG00000164692
ENSG00000033170	ENSG00000126947	ENSG00000134121
ENSG00000198046	ENSG00000196620	ENSG00000186827
ENSG00000108405	ENSG00000082438	ENSG00000117650
ENSG00000181722	ENSG00000154153	ENSG00000043039
ENSG00000163563	ENSG00000163563	ENSG00000197757
ENSG00000165168	ENSG00000014914	ENSG00000157456
ENSG00000268765	ENSG00000088340	ENSG00000197993
ENSG00000137965	ENSG00000118271	ENSG00000171564
ENSG00000081052	ENSG00000142192	ENSG00000175063
ENSG00000172292	ENSG00000114541	ENSG00000166803
ENSG00000172575	ENSG00000118520	ENSG00000160183
ENSG00000139278	ENSG00000167768	ENSG00000143797
ENSG00000006756	ENSG00000175048	ENSG00000204634
ENSG00000076554	ENSG00000165092	ENSG00000007038
ENSG00000148700	ENSG00000065534	ENSG00000167618
ENSG00000136068	ENSG00000184979	ENSG00000101335
ENSG00000176014	ENSG00000185950	ENSG00000229314
ENSG00000137642	ENSG00000185745	ENSG00000223609
ENSG00000125844	ENSG00000100644	ENSG00000198807
ENSG00000176871	ENSG00000256269	ENSG00000130529
ENSG00000196620	ENSG00000261883	ENSG00000178695
ENSG00000130775	ENSG00000145335	ENSG00000154153
ENSG00000112799	ENSG00000197993	ENSG00000094804
ENSG00000151240	ENSG00000175063	ENSG00000075340
ENSG00000143061	ENSG00000038427	ENSG00000250722
ENSG00000197696	ENSG00000163687	ENSG00000087494
ENSG00000171246	ENSG00000163827	ENSG00000118200
ENSG00000127920	ENSG00000107447	ENSG00000066926
ENSG00000167202	ENSG00000141556	ENSG00000182389
ENSG00000069188	ENSG00000090013	ENSG00000105538
ENSG00000105205	ENSG00000118432	ENSG00000196730
ENSG00000167748	ENSG00000185697	ENSG00000196616
ENSG00000148429	ENSG00000182809	ENSG00000171560
ENSG00000100644	ENSG00000123405	ENSG00000187134
ENSG00000170396	ENSG00000188672	ENSG00000112212
ENSG00000197381	ENSG00000185920	ENSG00000133026
ENSG00000073417	ENSG00000169397	ENSG00000189060
ENSG00000196781	ENSG00000244734	ENSG00000105889
ENSG00000137959	ENSG00000095739	ENSG00000128040
ENSG00000142192	ENSG00000143476	ENSG00000109255
ENSG00000197888	ENSG00000137642	ENSG00000132321
ENSG00000104450	ENSG00000102409	ENSG00000179750
ENSG00000196664	ENSG00000250361	ENSG00000118113
ENSG00000062524	ENSG00000166592	ENSG00000109805
ENSG00000088340	ENSG00000151491	ENSG00000257017
ENSG00000124570	ENSG00000187010	ENSG00000158874
ENSG00000124491	ENSG00000005381	ENSG00000125730
ENSG00000102174	ENSG00000135114	ENSG00000167513
ENSG00000167207	ENSG00000086506	ENSG00000185222
ENSG00000140443	ENSG00000112742	ENSG00000061676
ENSG00000096060	ENSG00000131747	ENSG00000170412
ENSG00000037042	ENSG00000198807	ENSG00000152785
ENSG00000112320	ENSG00000134057	ENSG00000171241
ENSG00000028137	ENSG00000106066	ENSG00000174837
ENSG00000088992	ENSG00000148700	ENSG00000171557
ENSG00000170873	ENSG00000088325	ENSG00000178053
ENSG00000188404	ENSG00000137959	ENSG00000169403
ENSG00000127074	ENSG00000060138	ENSG00000114541
ENSG00000149269	ENSG00000136603	ENSG00000079931
ENSG00000204634	ENSG00000170312	ENSG00000256269
ENSG00000152894	ENSG00000134827	ENSG00000261883
ENSG00000067057	ENSG00000180530	ENSG00000141441
ENSG00000173530	ENSG00000143797	ENSG00000164542
ENSG00000176834	ENSG00000197561	ENSG00000164045
ENSG00000138613	ENSG00000149557	ENSG00000126947
ENSG00000089692	ENSG00000176834	ENSG00000106952
ENSG00000113140	ENSG00000112212	ENSG00000137942
ENSG00000101057	ENSG00000196431	ENSG00000086506
ENSG00000179388	ENSG00000081181	ENSG00000113070
ENSG00000077782	ENSG00000066923	ENSG00000145386
ENSG00000112137	ENSG00000066279	ENSG00000170365
ENSG00000139722	ENSG00000170458	ENSG00000154262
ENSG00000167613	ENSG00000105889	ENSG00000100558
ENSG00000109787	ENSG00000178695	ENSG00000070182
ENSG00000123975	ENSG00000135407	ENSG00000112742
ENSG00000112303	ENSG00000204852	ENSG00000228278
ENSG00000137752	ENSG00000094804	ENSG00000172594
ENSG00000160789	ENSG00000104450	ENSG00000145321
ENSG00000111801	ENSG00000155093	ENSG00000155962
ENSG00000120875	ENSG00000197461	ENSG00000151090
ENSG00000162804	ENSG00000111732	ENSG00000134802
ENSG00000152953	ENSG00000196586	ENSG00000133818
ENSG00000184979	ENSG00000134709	ENSG00000088325
ENSG00000177556	ENSG00000134460	ENSG00000183570
ENSG00000102221	ENSG00000138207	ENSG00000145826
ENSG00000198805	ENSG00000148773	ENSG00000168610
ENSG00000118922	ENSG00000131669	ENSG00000178573
ENSG00000154229	ENSG00000142949	ENSG00000134709
ENSG00000151490	ENSG00000204613	ENSG00000167900
ENSG00000120885	ENSG00000123080	ENSG00000157551
ENSG00000100027	ENSG00000152953	ENSG00000117399
ENSG00000240563	ENSG00000147324	ENSG00000196431
ENSG00000186470	ENSG00000128040	ENSG00000112299
ENSG00000106462	ENSG00000119326	ENSG00000089685
ENSG00000182463	ENSG00000111837	ENSG00000135218
ENSG00000006576	ENSG00000112799	ENSG00000123485
ENSG00000115109	ENSG00000100079	ENSG00000105974
ENSG00000112195	ENSG00000152785	ENSG00000169245
ENSG00000102409	ENSG00000250722	ENSG00000024526
ENSG00000100077	ENSG00000123485	ENSG00000084674
ENSG00000078269	ENSG00000101425	ENSG00000182611
ENSG00000143641	ENSG00000162367	ENSG00000164398
ENSG00000128791	ENSG00000240505	ENSG00000091583
ENSG00000168899	ENSG00000100266	ENSG00000108691
ENSG00000105173	ENSG00000133069	ENSG00000184304
ENSG00000154146	ENSG00000182611	ENSG00000178999
ENSG00000163406	ENSG00000005238	ENSG00000133424
ENSG00000144724	ENSG00000124469	ENSG00000123405
ENSG00000101335	ENSG00000123201	ENSG00000196188
ENSG00000084234	ENSG00000102221	ENSG00000125962
ENSG00000026652	ENSG00000118113	ENSG00000150776
ENSG00000147324	ENSG00000153283	ENSG00000262506
ENSG00000136758	ENSG00000197696	ENSG00000135047
ENSG00000163568	ENSG00000125730	ENSG00000131747
ENSG00000172493	ENSG00000154277	ENSG00000204370
ENSG00000181852	ENSG00000119888	ENSG00000109320
ENSG00000196839	ENSG00000102981	ENSG00000240583
ENSG00000100097	ENSG00000160712	ENSG00000166349
ENSG00000196263	ENSG00000133818	ENSG00000111224
ENSG00000145088	ENSG00000111224	ENSG00000162512
ENSG00000133878	ENSG00000007038	ENSG00000196586
ENSG00000169136	ENSG00000197208	ENSG00000149311
ENSG00000044459	ENSG00000188404	ENSG00000157240
ENSG00000179639	ENSG00000197757	ENSG00000131203
ENSG00000166780	ENSG00000159788	ENSG00000100266
ENSG00000105974	ENSG00000100448	ENSG00000138207
ENSG00000145287	ENSG00000228278	ENSG00000221838
ENSG00000061656	ENSG00000171105	ENSG00000116675
ENSG00000114770	ENSG00000066926	ENSG00000182809
ENSG00000124942	ENSG00000167618	ENSG00000106327
ENSG00000179583	ENSG00000121101	ENSG00000149054
ENSG00000100068	ENSG00000178718	ENSG00000204983
ENSG00000118263	ENSG00000124107	ENSG00000156076
ENSG00000072858	ENSG00000168675	ENSG00000163464
ENSG00000116017	ENSG00000133116	ENSG00000148700
ENSG00000108582	ENSG00000111817	ENSG00000102038
ENSG00000075826	ENSG00000171564	ENSG00000185697
ENSG00000241106	ENSG00000141526	ENSG00000160307
ENSG00000145416	ENSG00000074706	ENSG00000105246
ENSG00000152784	ENSG00000139278	ENSG00000102409
ENSG00000086666	ENSG00000182240	ENSG00000166266
ENSG00000087266	ENSG00000109255	ENSG00000085514
ENSG00000030419	ENSG00000170412	ENSG00000183072
ENSG00000114541	ENSG00000196188	ENSG00000164105
ENSG00000058866	ENSG00000171723	ENSG00000184292
ENSG00000158373	ENSG00000171557	ENSG00000162733
ENSG00000165175	ENSG00000198846	ENSG00000119328
ENSG00000106624	ENSG00000145386	ENSG00000137710
ENSG00000012124	ENSG00000109654	ENSG00000166592
ENSG00000064042	ENSG00000125962	ENSG00000169641
ENSG00000104447	ENSG00000107317	ENSG00000115641
ENSG00000145246	ENSG00000136636	ENSG00000114346
ENSG00000112773	ENSG00000100526	ENSG00000142192
ENSG00000107779	ENSG00000172380	ENSG00000003436
ENSG00000064393	ENSG00000154229	ENSG00000160712
ENSG00000125726	ENSG00000133169	ENSG00000062370
ENSG00000147044	ENSG00000145826	ENSG00000072422
ENSG00000106484	ENSG00000106327	ENSG00000079308
ENSG00000105854	ENSG00000137198	ENSG00000138083
ENSG00000244405	ENSG00000140403	ENSG00000135407
ENSG00000173334	ENSG00000168917	ENSG00000010310
ENSG00000198467	ENSG00000091583	ENSG00000171723
ENSG00000104728	ENSG00000026652	ENSG00000176463
ENSG00000182866	ENSG00000077782	ENSG00000101307
ENSG00000117020	ENSG00000101439	ENSG00000088280
ENSG00000128886	ENSG00000122952	ENSG00000183722
ENSG00000137504	ENSG00000121895	ENSG00000104738
ENSG00000085117	ENSG00000131470	ENSG00000185950
ENSG00000129675	ENSG00000138378	ENSG00000163347
ENSG00000133818	ENSG00000171843	ENSG00000127507
ENSG00000111666	ENSG00000115590	ENSG00000133169
ENSG00000131042	ENSG00000133026	ENSG00000186998
ENSG00000153395	ENSG00000169403	ENSG00000164647
ENSG00000131981	ENSG00000185291	ENSG00000165802
ENSG00000149970	ENSG00000006704	ENSG00000095739
ENSG00000145685	ENSG00000109805	ENSG00000128322
ENSG00000069849	ENSG00000137807	ENSG00000136872
ENSG00000117009	ENSG00000120875	ENSG00000163586
ENSG00000151090	ENSG00000111144	ENSG00000152253
ENSG00000181090	ENSG00000131724	ENSG00000172232
ENSG00000171105	ENSG00000187667	ENSG00000008283
ENSG00000143387	ENSG00000089692	ENSG00000065328
ENSG00000111670	ENSG00000126262	ENSG00000125144
ENSG00000106100	ENSG00000142945	ENSG00000088387
ENSG00000137193	ENSG00000229314	ENSG00000129749
ENSG00000117289	ENSG00000171476	ENSG00000124253
ENSG00000163659	ENSG00000121621	ENSG00000134532
ENSG00000215375	ENSG00000131153	ENSG00000116983
ENSG00000111817	ENSG00000140948	ENSG00000005238
ENSG00000198353	ENSG00000061676	ENSG00000136193
ENSG00000273266	ENSG00000138185	ENSG00000118137
ENSG00000152700	ENSG00000149311	ENSG00000135414
ENSG00000109458	ENSG00000135119	ENSG00000150687
ENSG00000136141	ENSG00000073417	ENSG00000137807
ENSG00000156711	ENSG00000168878	ENSG00000135114
ENSG00000060138	ENSG00000116106	ENSG00000111817
ENSG00000068878	ENSG00000004468	ENSG00000184226
ENSG00000133742	ENSG00000138778	ENSG00000142794
ENSG00000128694	ENSG00000080823	ENSG00000147231
ENSG00000111328	ENSG00000131437	ENSG00000050405
ENSG00000153561	ENSG00000148175	ENSG00000136942
ENSG00000169896	ENSG00000164105	ENSG00000091409
ENSG00000072110	ENSG00000196730	ENSG00000105048
ENSG00000073910	ENSG00000086548	ENSG00000175048
ENSG00000137871	ENSG00000134121	ENSG00000100605
ENSG00000160255	ENSG00000043039	ENSG00000176887
ENSG00000171310	ENSG00000178053	ENSG00000073792
ENSG00000197724	ENSG00000163818	ENSG00000078487
ENSG00000185442	ENSG00000151090	ENSG00000102221
ENSG00000026950	ENSG00000100504	ENSG00000104043
ENSG00000170340	ENSG00000179299	ENSG00000065618
ENSG00000140577	ENSG00000070081	ENSG00000114126
ENSG00000113504	ENSG00000170145	ENSG00000243709
ENSG00000152767	ENSG00000180871	ENSG00000205726
ENSG00000050438	ENSG00000142794	ENSG00000198157
ENSG00000136153	ENSG00000114126	ENSG00000126262
ENSG00000157601	ENSG00000132510	ENSG00000196226
ENSG00000155380	ENSG00000064042	ENSG00000164125
ENSG00000170476	ENSG00000145555	ENSG00000172348
ENSG00000107242	ENSG00000105246	ENSG00000169575
ENSG00000230989	ENSG00000182901	ENSG00000146678
ENSG00000104635	ENSG00000147454	ENSG00000137642
ENSG00000152465	ENSG00000164398	ENSG00000183625
ENSG00000149311	ENSG00000010539	ENSG00000112715
ENSG00000132842	ENSG00000090861	ENSG00000222040
ENSG00000177042	ENSG00000189058	ENSG00000082397
ENSG00000081189	ENSG00000113504	ENSG00000110619
ENSG00000182718	ENSG00000163026	ENSG00000125384
ENSG00000035862	ENSG00000134531	ENSG00000038427
ENSG00000111859	ENSG00000111885	ENSG00000102145
ENSG00000175265	ENSG00000137965	ENSG00000065882
ENSG00000215252	ENSG00000104728	ENSG00000101350
ENSG00000105486	ENSG00000102837	ENSG00000111837
ENSG00000134352	ENSG00000167851	ENSG00000091513
ENSG00000151702	ENSG00000170921	ENSG00000130208
ENSG00000111913	ENSG00000125384	ENSG00000026559
ENSG00000182378	ENSG00000196226	ENSG00000151150
ENSG00000124181	ENSG00000148180	ENSG00000153283
ENSG00000144645	ENSG00000115084	ENSG00000142583
ENSG00000123146	ENSG00000162627	ENSG00000106004
ENSG00000101079	ENSG00000141441	ENSG00000145982
ENSG00000204852	ENSG00000128322	ENSG00000091181
ENSG00000100290	ENSG00000178573	ENSG00000122952
ENSG00000060762	ENSG00000114315	ENSG00000111144
ENSG00000112367	ENSG00000105538	ENSG00000071282
ENSG00000145990	ENSG00000135363	ENSG00000106927
ENSG00000169155	ENSG00000169136	ENSG00000147454
ENSG00000143772	ENSG00000152147	ENSG00000116337
ENSG00000204267	ENSG00000150776	ENSG00000106268
ENSG00000165475	ENSG00000262506	ENSG00000186153
ENSG00000135272	ENSG00000171560	ENSG00000240505
ENSG00000102349	ENSG00000131773	ENSG00000050555
ENSG00000162702	ENSG00000170873	ENSG00000132640
ENSG00000163346	ENSG00000129173	ENSG00000102962
ENSG00000110934	ENSG00000198157	ENSG00000129682
ENSG00000160999	ENSG00000184357	ENSG00000133816
ENSG00000010932	ENSG00000163464	ENSG00000154277
ENSG00000203710	ENSG00000119917	ENSG00000109943
ENSG00000138378	ENSG00000104738	ENSG00000163541
ENSG00000074657	ENSG00000197465	ENSG00000089876
ENSG00000163029	ENSG00000104043	ENSG00000135643
ENSG00000132849	ENSG00000174837	ENSG00000149308
ENSG00000196405	ENSG00000198336	ENSG00000196136
ENSG00000029363	ENSG00000163808	ENSG00000273259
ENSG00000182117	ENSG00000171241	ENSG00000164010
ENSG00000181788	ENSG00000119328	ENSG00000170871
ENSG00000171208	ENSG00000076554	ENSG00000204262
ENSG00000204386	ENSG00000116874	ENSG00000172493
ENSG00000140259	ENSG00000079931	ENSG00000008516
ENSG00000112576	ENSG00000110245	ENSG00000147324
ENSG00000168785	ENSG00000135047	ENSG00000180182
ENSG00000106692	ENSG00000167900	ENSG00000106123
ENSG00000213145	ENSG00000050438	ENSG00000101442
ENSG00000257341	ENSG00000102854	ENSG00000135636
ENSG00000271325	ENSG00000166483	ENSG00000206560
ENSG00000083312	ENSG00000138083	ENSG00000143479
ENSG00000111846	ENSG00000178999	ENSG00000085185
ENSG00000136636	ENSG00000100558	ENSG00000145335
ENSG00000125089	ENSG00000104918	ENSG00000070019
ENSG00000136450	ENSG00000145982	ENSG00000164877
ENSG00000145020	ENSG00000107789	ENSG00000050426
ENSG00000171163	ENSG00000165682	ENSG00000083845
ENSG00000109756	ENSG00000005189	ENSG00000117791
ENSG00000091879	ENSG00000187621	ENSG00000227242
ENSG00000145439	ENSG00000076382	ENSG00000150938
ENSG00000006638	ENSG00000172232	ENSG00000261899
ENSG00000111885	ENSG00000198467	ENSG00000090013
ENSG00000221968	ENSG00000101057	ENSG00000119535
ENSG00000068831	ENSG00000139679	ENSG00000121380
ENSG00000166401	ENSG00000166510	ENSG00000167283
ENSG00000138185	ENSG00000044459	ENSG00000133116
ENSG00000179344	ENSG00000061656	ENSG00000100644
ENSG00000100034	ENSG00000136040	ENSG00000164741
ENSG00000168405	ENSG00000147231	ENSG00000165659
ENSG00000174437	ENSG00000187134	ENSG00000167850
ENSG00000104894	ENSG00000109320	ENSG00000070081
ENSG00000112972	ENSG00000169679	ENSG00000143641
ENSG00000164305	ENSG00000048052	ENSG00000180914
ENSG00000176903	ENSG00000089876	ENSG00000197461
ENSG00000095777	ENSG00000162772	ENSG00000104093
ENSG00000112144	ENSG00000113924	ENSG00000132716
ENSG00000145214	ENSG00000196275	ENSG00000100526
ENSG00000135535	ENSG00000157216	ENSG00000185215
ENSG00000118507	ENSG00000110619	ENSG00000129910
ENSG00000101574	ENSG00000169902	ENSG00000117528
ENSG00000138380	ENSG00000026559	ENSG00000108700
ENSG00000168734	ENSG00000100290	ENSG00000138778
ENSG00000166598	ENSG00000062370	ENSG00000155111
ENSG00000048740	ENSG00000145321	ENSG00000166037
ENSG00000151726	ENSG00000131203	ENSG00000103647
ENSG00000104549	ENSG00000009790	ENSG00000171735
ENSG00000100300	ENSG00000134802	ENSG00000101843
ENSG00000105483	ENSG00000204370	ENSG00000172243
ENSG00000136875	ENSG00000215375	ENSG00000119636
ENSG00000100554	ENSG00000087494	ENSG00000104231
ENSG00000172594	ENSG00000152700	ENSG00000122861
ENSG00000167261	ENSG00000183072	ENSG00000138587
ENSG00000160179	ENSG00000162512	ENSG00000137815
ENSG00000141098	ENSG00000189060	ENSG00000100258
ENSG00000164808	ENSG00000106268	ENSG00000154864
ENSG00000272972	ENSG00000213066	ENSG00000151693
ENSG00000158578	ENSG00000065485	ENSG00000180530
ENSG00000131437	ENSG00000128284	ENSG00000140525
ENSG00000142546	ENSG00000108691	ENSG00000145817
ENSG00000168763	ENSG00000063127	ENSG00000183340
ENSG00000138756	ENSG00000170365	ENSG00000131437
ENSG00000102100	ENSG00000101773	ENSG00000254772
ENSG00000162909	ENSG00000131462	ENSG00000139636
ENSG00000124508	ENSG00000136842	ENSG00000102854
ENSG00000123240	ENSG00000185222	ENSG00000156931
ENSG00000162368	ENSG00000125629	ENSG00000168078
ENSG00000115919	ENSG00000119922	ENSG00000086288
ENSG00000108465	ENSG00000152767	ENSG00000163026
ENSG00000112079	ENSG00000050405	ENSG00000146592
ENSG00000150867	ENSG00000070019	ENSG00000187116
ENSG00000070759	ENSG00000078487	ENSG00000087128
ENSG00000108797	ENSG00000137804	ENSG00000175591
ENSG00000101849	ENSG00000076043	ENSG00000136044
ENSG00000132434	ENSG00000155962	ENSG00000104611
ENSG00000146021	ENSG00000151150	ENSG00000118762
ENSG00000114446	ENSG00000106952	ENSG00000183134
ENSG00000142102	ENSG00000169245	ENSG00000003249
ENSG00000105856	ENSG00000165702	ENSG00000127954
ENSG00000136732	ENSG00000183570	ENSG00000240370
ENSG00000182199	ENSG00000165506	ENSG00000008441
ENSG00000011566	ENSG00000104231	ENSG00000183032
ENSG00000204681	ENSG00000107537	ENSG00000131462
ENSG00000121064	ENSG00000082781	ENSG00000173482
ENSG00000152291	ENSG00000118707	ENSG00000180098
ENSG00000072210	ENSG00000198053	ENSG00000092978
ENSG00000152942	ENSG00000075340	ENSG00000139629
ENSG00000109654	ENSG00000243709	ENSG00000125629
ENSG00000107077	ENSG00000133424	ENSG00000134489
ENSG00000184867	ENSG00000164877	ENSG00000170145
ENSG00000163349	ENSG00000149308	ENSG00000167077
ENSG00000204569	ENSG00000119537	ENSG00000139679
ENSG00000120899	ENSG00000187801	ENSG00000197321
ENSG00000107938	ENSG00000137265	ENSG00000197208
ENSG00000127666	ENSG00000139514	ENSG00000165702
ENSG00000105835	ENSG00000109775	ENSG00000163600
ENSG00000165819	ENSG00000080819	ENSG00000125170
ENSG00000105193	ENSG00000095777	ENSG00000129195
ENSG00000065882	ENSG00000196616	ENSG00000187741
ENSG00000167280	ENSG00000185338	ENSG00000171246
ENSG00000100055	ENSG00000183722	ENSG00000102981
ENSG00000171467	ENSG00000118200	ENSG00000127074
ENSG00000130529	ENSG00000136870	ENSG00000090861
ENSG00000126947	ENSG00000167193	ENSG00000131374
ENSG00000102893	ENSG00000249992	ENSG00000166377
ENSG00000168878	ENSG00000124570	ENSG00000131149
ENSG00000185344	ENSG00000137942	ENSG00000074695
ENSG00000111445	ENSG00000205084	ENSG00000188783
ENSG00000173653	ENSG00000166165	ENSG00000115241
ENSG00000173715	ENSG00000171155	ENSG00000101493
ENSG00000196275	ENSG00000160271	ENSG00000070718
ENSG00000091592	ENSG00000106367	ENSG00000132613
ENSG00000140948	ENSG00000118137	ENSG00000005381
ENSG00000134709	ENSG00000113070	ENSG00000121381
ENSG00000104432	ENSG00000170779	ENSG00000101977
ENSG00000074706	ENSG00000122140	ENSG00000147459
ENSG00000096433	ENSG00000137806	ENSG00000130821
ENSG00000104783	ENSG00000183625	ENSG00000205084
ENSG00000174485	ENSG00000106479	ENSG00000253485
ENSG00000071794	ENSG00000198954	ENSG00000165949
ENSG00000173611	ENSG00000006327	ENSG00000011105
ENSG00000012660	ENSG00000117289	ENSG00000169679
ENSG00000079263	ENSG00000170871	ENSG00000184613
ENSG00000077420	ENSG00000136153	ENSG00000141562
ENSG00000204475	ENSG00000164692	ENSG00000013561
ENSG00000106133	ENSG00000131089	ENSG00000115718
ENSG00000223705	ENSG00000106484	ENSG00000110245
ENSG00000185989	ENSG00000117155	ENSG00000160271
ENSG00000135678	ENSG00000198919	ENSG00000086548
ENSG00000142794	ENSG00000105641	ENSG00000166016
ENSG00000204287	ENSG00000005020	ENSG00000114315
ENSG00000086300	ENSG00000070182	ENSG00000093000
ENSG00000196187	ENSG00000221838	ENSG00000135341
ENSG00000123131	ENSG00000145416	ENSG00000132517
ENSG00000104880	ENSG00000050555	ENSG00000171365
ENSG00000078237	ENSG00000178896	ENSG00000131831
ENSG00000205084	ENSG00000138435	ENSG00000100528
ENSG00000182809	ENSG00000116062	ENSG00000168594
ENSG00000106799	ENSG00000104147	ENSG00000170779
ENSG00000119599	ENSG00000198369	ENSG00000163563
ENSG00000101004	ENSG00000187193	ENSG00000124813
ENSG00000074266	ENSG00000139725	ENSG00000088367
ENSG00000010539	ENSG00000154262	ENSG00000163631
ENSG00000204304	ENSG00000126773	ENSG00000128284
ENSG00000117091	ENSG00000154803	ENSG00000205336
ENSG00000117519	ENSG00000178105	ENSG00000087258
ENSG00000124243	ENSG00000101442	ENSG00000126822
ENSG00000005020	ENSG00000135643	ENSG00000198846
ENSG00000196177	ENSG00000198380	ENSG00000183486
ENSG00000110721	ENSG00000172331	ENSG00000122140
ENSG00000101224	ENSG00000143641	ENSG00000142945
ENSG00000156110	ENSG00000176485	ENSG00000166595
ENSG00000077312	ENSG00000106123	ENSG00000134827
ENSG00000152229	ENSG00000213085	ENSG00000151640
ENSG00000113810	ENSG00000131149	ENSG00000046604
ENSG00000093000	ENSG00000086827	ENSG00000143771
ENSG00000113269	ENSG00000130856	ENSG00000109775
ENSG00000132424	ENSG00000145819	ENSG00000009709
ENSG00000134294	ENSG00000167513	ENSG00000143727
ENSG00000188641	ENSG00000205810	ENSG00000010327
ENSG00000135423	ENSG00000127334	ENSG00000174306
ENSG00000066926	ENSG00000153485	ENSG00000137714
ENSG00000119866	ENSG00000100479	ENSG00000134057
ENSG00000023330	ENSG00000116815	ENSG00000047648
ENSG00000142347	ENSG00000023572	ENSG00000104147
ENSG00000262149	ENSG00000003436	ENSG00000181631
ENSG00000239713	ENSG00000111602	ENSG00000167964
ENSG00000137270	ENSG00000101236	ENSG00000205810
ENSG00000135604	ENSG00000139629	ENSG00000174915
ENSG00000100422	ENSG00000024526	ENSG00000124788
ENSG00000162734	ENSG00000136875	ENSG00000062725
ENSG00000108588	ENSG00000152253	ENSG00000010539
ENSG00000030582	ENSG00000169575	ENSG00000165507
ENSG00000116793	ENSG00000177030	ENSG00000124107
ENSG00000260916	ENSG00000088280	ENSG00000197465
ENSG00000124256	ENSG00000183486	ENSG00000197958
ENSG00000138764	ENSG00000131831	ENSG00000123838
ENSG00000152601	ENSG00000133101	ENSG00000166783
ENSG00000178802	ENSG00000125144	ENSG00000088340
ENSG00000141526	ENSG00000132205	ENSG00000112699
ENSG00000198690	ENSG00000168078	ENSG00000109099
ENSG00000064933	ENSG00000065613	ENSG00000197561
ENSG00000155093	ENSG00000173848	ENSG00000034713
